# Supplementary material for: AZF deletions in Indian populations: original study and meta-analyses
Source: Springer Nature journal article supplement (doi:10.1007/s10815-019-01661-0), 2020-01-09
Supplement: MOESM1 [file 17674876]

## Sheet: Charecterstic of studies
AZFa
Study	Geographical region	Total	Cases (With deletion)	Cases (without deletion)	Total	Control (With deletion)	Control (Without deletion)	Frequency of deletions in cases (%)	Average frequency
Athalye et al. 2004	Western India	100	3	97	5	0	5	3	4.00388
Mitra et al. 2008	North India	170	2	168	101	0	101	1.17647
Ambulkar et al. 2014	Western India	156	2	154	50	0	50	1.28205
Nailwal et al. 2017	Western India	141	9	132	159	0	159	6.38298
Ambulkar et al. 2017	Western India	160	17	143	50	0	50	10.625
Rani et al. 2019	South India	973	31	942	587	0	587	3.18602
Present study	North India	379	9	370	265	0	265	2.37467
Total		2079	73	2006	1217	0	1217
AZFb
Study	Geographical region	Total	Cases (With deletion)	Cases (without deletion)	Total	Control (With deletion)	Control (Without deletion)	Frequency of deletions in cases (%)	Average frequency
Dada et al. 2004	North India	133	1	132	50	0	50	0.75188	3.21215
Athalye et al. 2004	Western India	100	7	93	5	0	5	7
Mitra et al. 2008	North India	170	1	169	101	0	101	0.588235
Ambulkar et al. 2014	Western India	156	2	154	50	0	50	1.28205
Nailwal et al. 2017	Western India	141	13	128	159	0	159	9.21986
Ambulkar et al. 2017	Western India	160	2	158	50	0	50	1.25
Rani et al. 2019	South India	973	34	939	587	0	587	3.49435
Present study	North India	379	8	371	265	0	265	2.11082
Total		2212	68	2144	1267	0	1267
AZFc
Study	Geographical region	Total	Cases (With deletion)	Cases (without deletion)	Total	Control (With deletion)	Control (Without deletion)	Frequency of deletions in cases (%)	Average frequency
Dada et al. 2004	North India	133	4	129	50	0	50	3.00752	6.26916
Athalye et al. 2004	Western India	100	11	89	5	0	5	11
Singh et al. 2005	North India	270	13	257	204	0	204	4.81481
Mitra et al. 2008	North India	170	3	167	101	0	101	1.76471
Ambulkar et al. 2014	Western India	156	11	145	50	0	50	7.05128
Sen et al. 2015	Western India	827	72	755	312	0	312	8.70617
Bansal et al. 2016	North India	822	8	814	225	0	225	0.973236
Nailwal et al. 2017	Western India	141	24	117	159	0	159	17.0213
Ambulkar et al. 2017	Western India	160	9	151	50	0	50	5.625
Rani et al. 2019	South India	973	67	906	587	0	587	6.88592
Present study	North India	379	8	371	265	0	265	2.11082
Total		4131	357	3901	2008	0	2008
AZFb+c
Study	Geographical region	Total	Cases (With deletion)	Cases (without deletion)	Total	Control (With deletion)	Control (Without deletion)	Frequency of deletions in cases (%)	Average frequency
Singh et al. 2005	North India	270	2	268	204	0	204	0.740741	1.66037
Mitra et al. 2008	North India	170	3	167	101	0	101	1.76471
Ambulkar et al. 2017	Western India	160	3	157	50	0	50	1.875
Rani et al. 2019	South India	973	22	951	587	0	587	2.26105
Total		1573	30	1543	942	0	942
Average frequencies (pooled)			Combined frequency of AZF deletions in Indian population
AZFa	0.04		0.1348
AZFb	0.0321
AZFc	0.0627
AZFb+c	0.0166

## Sheet: Sheet1
	AZFa
	Athalye et al. 2004	3
	Mitra et al. 2008	1.17647
	Ambulkar et al. 2014	1.28205
	Nailwal et al. 2017	6.38298
	Ambulkar et al. 2017	10.625
	Rani et al. 2019	3.18602
	Present study	2.37467
	Average frequency	4.00388
	AZFb
	Dada et al. 2004	0.75188
	Athalye et al. 2004	7
	Mitra et al. 2008	0.588235
	Ambulkar et al. 2014	1.28205
	Nailwal et al. 2017	9.21986
	Ambulkar et al. 2017	1.25
	Rani et al. 2019	3.49435
	Present study	2.11082
	Average frequency	3.21215
	AZFc
	Dada et al. 2004	3.00752
	Athalye et al. 2004	11
	Singh et al. 2005	4.81481
	Mitra et al. 2008	1.76471
	Ambulkar et al. 2014	7.05128
	Sen et al. 2015	8.70617
	Bansal et al. 2016	0.973236
	Nailwal et al. 2017	17.0213
	Ambulkar et al. 2017	5.625
	Rani et al. 2019	6.88592
	Present study	2.11082
	Average frequency	6.26916
	AZFb+c
	Singh et al. 2005	0.740741
	Mitra et al. 2008	1.76471
	Ambulkar et al. 2017	1.875
	Rani et al. 2019	2.26105
	Average frequency	1.66037
